# Supplementary material
Source: Springer Nature journal article supplement (https://www.springermedizin.de/resource/supplementary/12889_2012_4744_MOESM3_ESM.pdf/9493836)

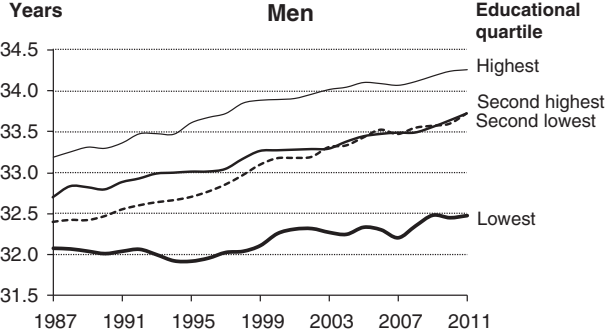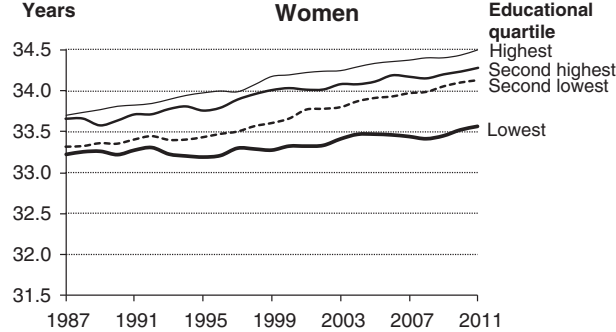

Supplement: MOESM3 [file 9493836]
